# Supplementary material for: F-SiO2-embedded PLA-based superhydrophobic nanofiber membrane for highly efficient membrane distillation
Source: Royal Society of Chemistry journal article supplement (doi:10.1039/d4ew00611a), 2024-01-01
Supplement: d4ew00611a1.pdf [file d4ew00611a1.pdf]

## **F-SiO<sub>2</sub> Eables PLA-based Superhydrophobic Nanofiber Membrane with Highly Efficient Membrane Distillation**

Yuqian He,<sup>a</sup> Yanyan Ye,<sup>a</sup> Mi Zhou,<sup>a</sup> Linlin Yan,<sup>a</sup> Kai Wang,<sup>a,b</sup> Yingjie Zhang,<sup>a,b</sup>

Enrico Drioli,<sup>c</sup> Jun Ma,<sup>a,d</sup> Yonggang Li<sup>\*c</sup>, Xi Quan Cheng<sup>\*a,b</sup>

a.State Key Laboratory of Urban Water Resource and Environment, School of Marine Science and Technology, Harbin Institute of Technology, Weihai 264209, P.R. China.

b.Shandong Sino-European Membrane Technology Research Institute Co., Ltd., Weihai Key Laboratory of Water Treatment and Membrane Technology, Weihai 264209, P.R. China.

c.Institute on Membrane Technology (ITM-CNR), Via P. Bucci 17c, 87036 Rende, CS, Italy.

d.School of Environmental Science and Engineering, Harbin Institute of Technology, Harbin 150001, P.R. China.

e.Guangxi Key Laboratory of Urban Water Environment, Baise University, Baise 533000, China

\*Corresponding author:

Email address: [chengxiquan@hit.edu.cn](mailto:chengxiquan@hit.edu.cn)

## Information S1. Materials

Dioxane (DX) was offered by Sinopharm Chemical Reagent Co Ltd (Shanghai, China). Polylactic acid (PLA) (4032D) was offered by NatureWorks (US). N-methyl pyrrolidone (NMP) was purchased from Tianjin Beichen Fangzheng Chemical Reagent Factory (Tianjin, China). Polydimethylsiloxane (PDMS) and its curing agent were supplied by Dow Corning Co., Ltd (US). Tetrahydrofuran (THF), silane (FTOS), silicon dioxide (25 mm), n-octane, tetraethyl orthosilicate (TEOS), trichloro (1H,1H,2H,2H-tridecafluoro-n-octyl) and trimethoxy (1H, 1H, 2H, 2H-heptadecafluorodecyl) silane were all obtained from Aladdin Biochemical Technology Co., Ltd (Shanghai, China).

## Information S2. Calculation of membrane distillation flux performance.

$$L = \Delta V / (A \times \Delta t) \quad \backslash * \text{MERGEFORMAT (1.1)}$$

where  $L$  represents the flux ( $\text{L m}^{-2} \text{h}^{-1}$ ) and  $\Delta V$ ,  $A$  and  $\Delta t$  represent the distillate volume variation over a predetermined time, the effective area of the composite membrane ( $\text{m}^2$ ) and filtration time (h), respectively. The  $A$  is  $11.63 \text{ cm}^2$ . The cross-flow velocity on the membrane surface was  $10 \text{ mL/min}$ , and the downstream freshwater temperature was controlled at  $10 \pm 2^\circ\text{C}$  by the low-temperature thermostat.

**Information S3. Calculation of the salt rejection of the membrane.**

$$R = \left(1 - \frac{C_p}{C_f}\right) \times 100\% \quad \backslash * \text{MERGEFORMAT (1.2)}$$

where  $C_f$  ( $\text{g L}^{-1}$ ) and  $C_p$  ( $\text{g L}^{-1}$ ) represent the conductivity of the feed solution and permeate water, respectively.

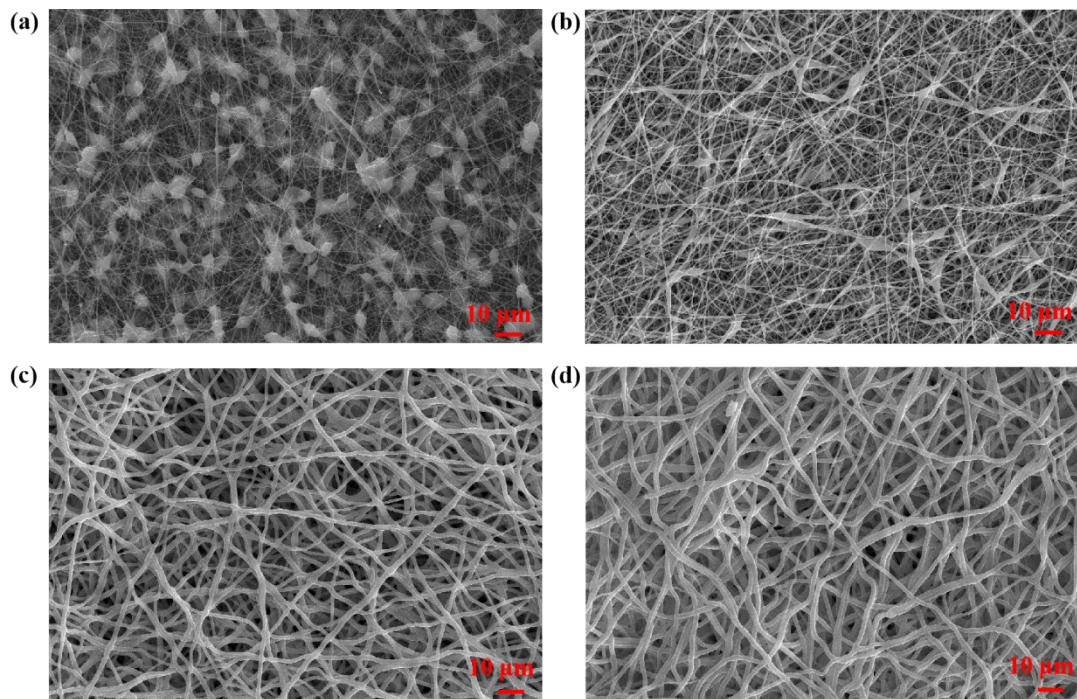

**Fig. S1.** Membrane surface morphology of desalination membranes with different concentrations of PLA: (a) 10%; (b) 12%; (c) 15%; (d) 17%.

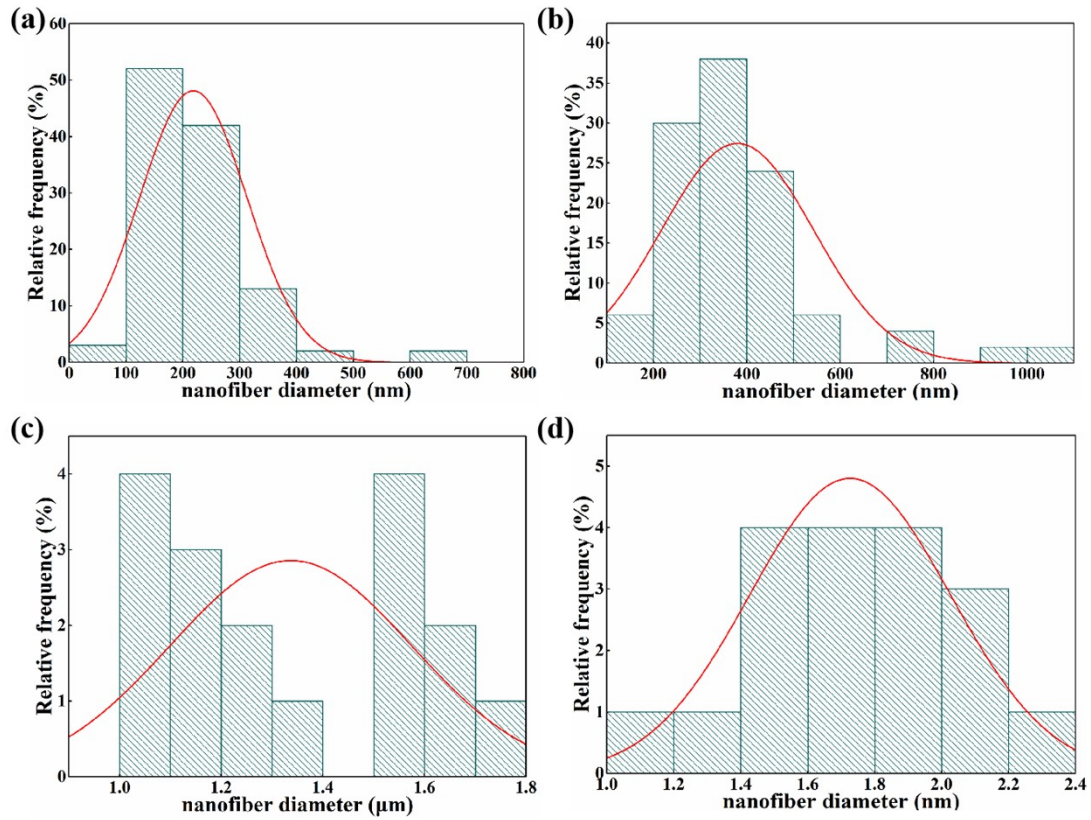

**Fig. S2.** Nanofibre diameters of desalination membranes with different concentrations of PLA: (a) 10%; (b) 12%; (c) 15%; (d) 17%.

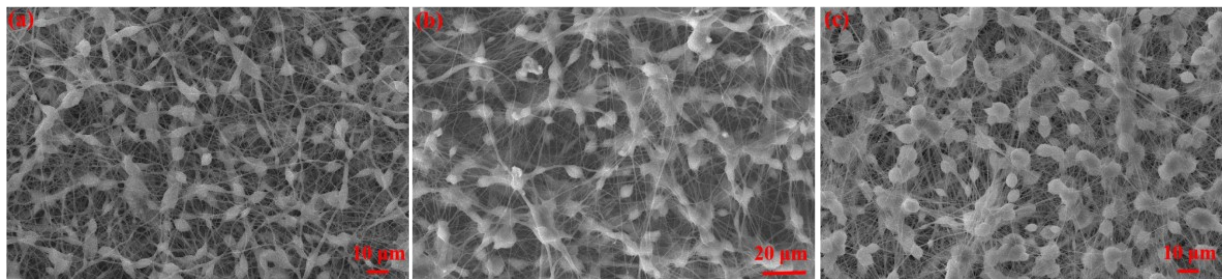

**Fig. S3.** Membrane surface morphology of desalination membranes with different concentrations of PDMS: (a) 8%; (b) 10%; (c) 12%.

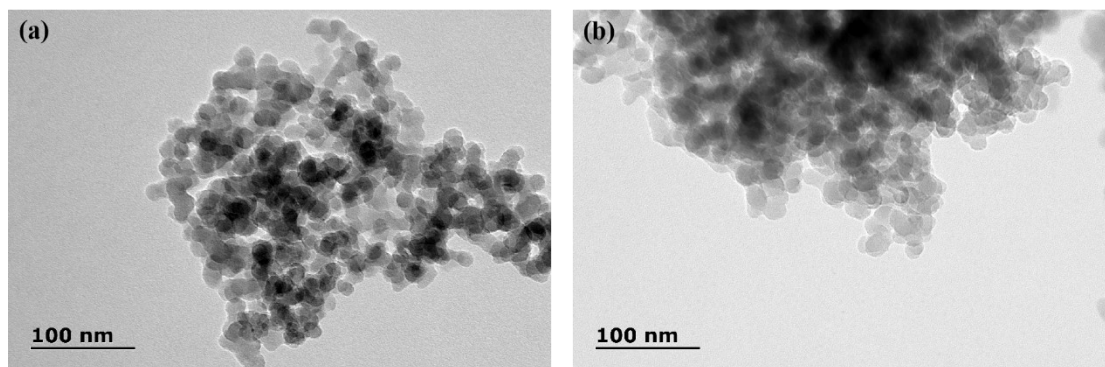

**Fig. S4.** TEM images of (a) SiO<sub>2</sub>, (2)F-SiO<sub>2</sub>.

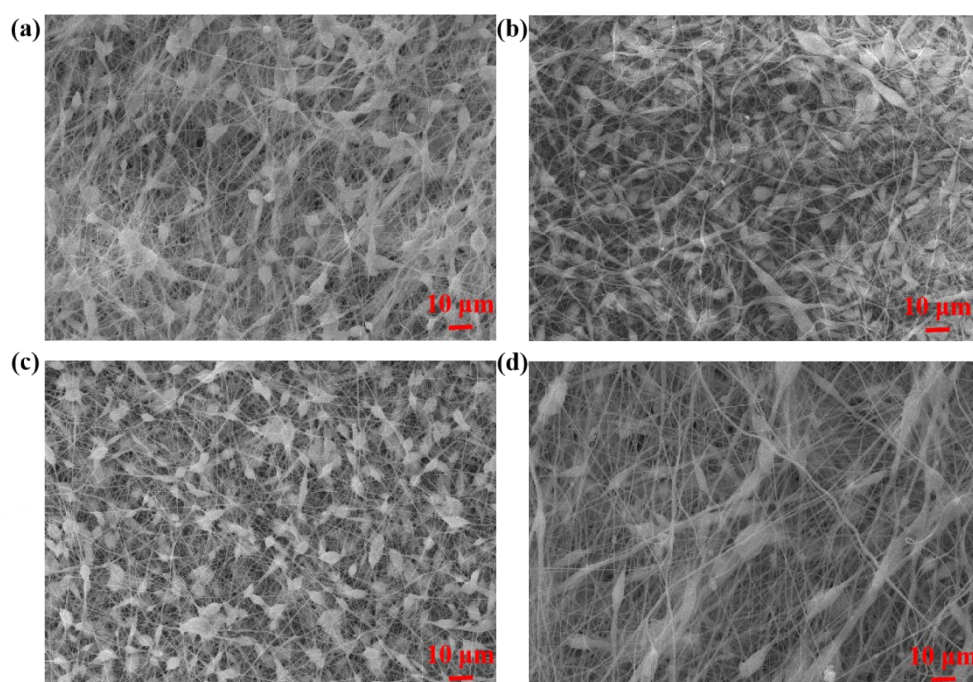

**Fig. S5.** Membrane surface morphology of desalination membranes with different concentrations

of F-SiO<sub>2</sub> nanoparticles: (a) 0.05%; (b) 0.1%; (c) 0.2%; (d) 0.5%.

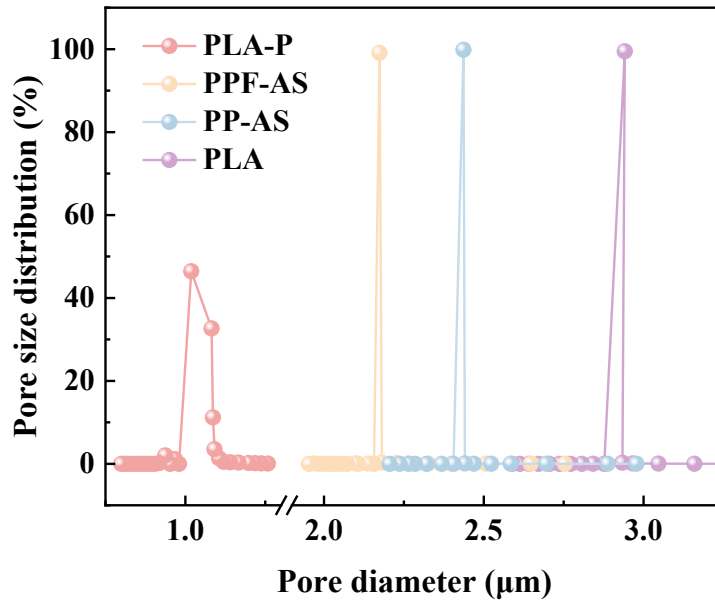

**Fig. S6.** Pore size distributions of PLA, PLA-P, PP-AS and PPF-AS membranes.

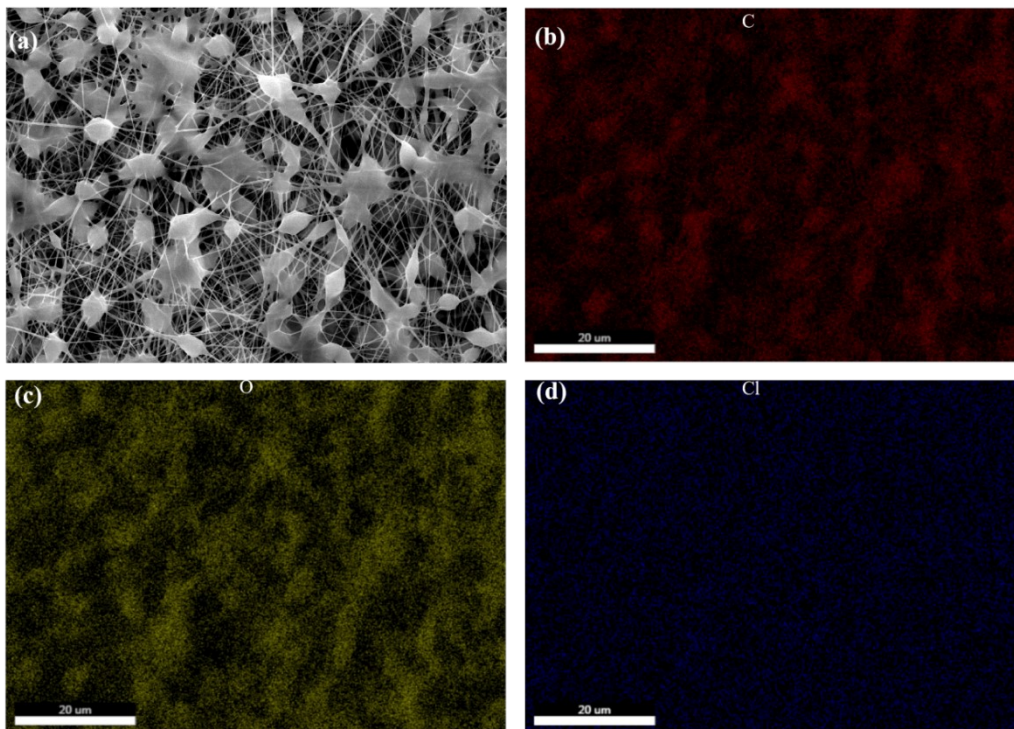

**Fig. S7.** EDS images of the PPF-AS membrane: (a) Range of distribution, (b) C element, (c) O element, (d) Cl element.
